# Supplementary material for: Studienstart International of the University of Cologne: The closely supervised semester of study entry for students from third countries using the example of the model degree program for human medicine
Source: PubMed Central journal article supplement (PMC6326400; doi:10.3205/zma001206), 2018-11-30
Supplement: JME-35-60-s-001.pdf [file JME-35-60-s-001.pdf]

# MUSTER

|                            |                                   |                                                                                     |
|----------------------------|-----------------------------------|-------------------------------------------------------------------------------------|
| EvaSys                     | SI End of the Semester Evaluation |  |
| International Office       |                                   |  |
| Studienstart International | End of the Semester Evaluation    |                                                                                     |

Please mark like this      Please use a ballpoint pen or a felt pen that is not too strong. This questionnaire is entered automatically.

Correction      In the interest of optimal data collection, please note the information given on the left when filling out.

## 1. Biographical data

1.1 Which subject do you study?

1.2 How old (in years) are you?

1.3 You are...

female

male

1.4 What is/are your native language/s?

1.5 What is your nationality?

## 2. Language

On the scale of the European Reference Frame (A1-C2), how do you estimate your German language skills in

|     |                                                                                                                        |    |                          |                          |                          |                          |                          |                          |    |
|-----|------------------------------------------------------------------------------------------------------------------------|----|--------------------------|--------------------------|--------------------------|--------------------------|--------------------------|--------------------------|----|
| 2.1 | Hearing                                                                                                                | A1 | <input type="checkbox"/> | <input type="checkbox"/> | <input type="checkbox"/> | <input type="checkbox"/> | <input type="checkbox"/> | <input type="checkbox"/> | C2 |
| 2.2 | Reading                                                                                                                | A1 | <input type="checkbox"/> | <input type="checkbox"/> | <input type="checkbox"/> | <input type="checkbox"/> | <input type="checkbox"/> | <input type="checkbox"/> | C2 |
| 2.3 | Speaking                                                                                                               | A1 | <input type="checkbox"/> | <input type="checkbox"/> | <input type="checkbox"/> | <input type="checkbox"/> | <input type="checkbox"/> | <input type="checkbox"/> | C2 |
| 2.4 | Writing                                                                                                                | A1 | <input type="checkbox"/> | <input type="checkbox"/> | <input type="checkbox"/> | <input type="checkbox"/> | <input type="checkbox"/> | <input type="checkbox"/> | C2 |
| 2.5 | Conversations                                                                                                          | A1 | <input type="checkbox"/> | <input type="checkbox"/> | <input type="checkbox"/> | <input type="checkbox"/> | <input type="checkbox"/> | <input type="checkbox"/> | C2 |
| 2.6 | How have you been placed at the placement Test from the department DaF in the beginning of Studienstart International? | A1 | <input type="checkbox"/> | <input type="checkbox"/> | <input type="checkbox"/> | <input type="checkbox"/> | <input type="checkbox"/> | <input type="checkbox"/> | C2 |

## 3. Organizational Commitment to University of Cologne (since WS16/17)

Please rate the statements on your degree of agreement on a scale from 1-5 (1 = Don't agree at all; 5 = Completely agree)

|     |                                                                              |                    |                          |                          |                          |                          |                          |                  |
|-----|------------------------------------------------------------------------------|--------------------|--------------------------|--------------------------|--------------------------|--------------------------|--------------------------|------------------|
| 3.1 | I am very happy to spend the entire course of my studies at this university. | Don't agree at all | <input type="checkbox"/> | <input type="checkbox"/> | <input type="checkbox"/> | <input type="checkbox"/> | <input type="checkbox"/> | Completely agree |
| 3.2 | I like to talk about my university with people that don't study here.        | Don't agree at all | <input type="checkbox"/> | <input type="checkbox"/> | <input type="checkbox"/> | <input type="checkbox"/> | <input type="checkbox"/> | Completely agree |
| 3.3 | I could easily feel associated with another university to an equal degree.   | Don't agree at all | <input type="checkbox"/> | <input type="checkbox"/> | <input type="checkbox"/> | <input type="checkbox"/> | <input type="checkbox"/> | Completely agree |
| 3.4 | I don't feel particularly emotionally attached to the university             | Don't agree at all | <input type="checkbox"/> | <input type="checkbox"/> | <input type="checkbox"/> | <input type="checkbox"/> | <input type="checkbox"/> | Completely agree |
| 3.5 | This university has a big personal significance for me                       | Don't agree at all | <input type="checkbox"/> | <input type="checkbox"/> | <input type="checkbox"/> | <input type="checkbox"/> | <input type="checkbox"/> | Completely agree |

# MUSTER

## 3. Organizational Commitment to University of Cologne (since WS16/17)

- |      |                                                                                                                                |                    |                          |                          |                          |                          |                          |                  |
|------|--------------------------------------------------------------------------------------------------------------------------------|--------------------|--------------------------|--------------------------|--------------------------|--------------------------|--------------------------|------------------|
| 3.6  | Even if I wanted to, it would be very difficult for me to leave this university at this point.                                 | Don't agree at all | <input type="checkbox"/> | <input type="checkbox"/> | <input type="checkbox"/> | <input type="checkbox"/> | <input type="checkbox"/> | Completely agree |
| 3.7  | Staying at this university is currently not only a necessity but also according to my wishes.                                  | Don't agree at all | <input type="checkbox"/> | <input type="checkbox"/> | <input type="checkbox"/> | <input type="checkbox"/> | <input type="checkbox"/> | Completely agree |
| 3.8  | I think, there is currently no real option for me to seriously consider a change of university.                                | Don't agree at all | <input type="checkbox"/> | <input type="checkbox"/> | <input type="checkbox"/> | <input type="checkbox"/> | <input type="checkbox"/> | Completely agree |
| 3.9  | You don't have to be loyal to your university.                                                                                 | Don't agree at all | <input type="checkbox"/> | <input type="checkbox"/> | <input type="checkbox"/> | <input type="checkbox"/> | <input type="checkbox"/> | Completely agree |
| 3.10 | It is ok to change from university to university.                                                                              | Don't agree at all | <input type="checkbox"/> | <input type="checkbox"/> | <input type="checkbox"/> | <input type="checkbox"/> | <input type="checkbox"/> | Completely agree |
| 3.11 | If another university would offer me a better study environment, I would consider it wrong to leave the University of Cologne. | Don't agree at all | <input type="checkbox"/> | <input type="checkbox"/> | <input type="checkbox"/> | <input type="checkbox"/> | <input type="checkbox"/> | Completely agree |
| 3.12 | It is not reasonable nowadays to participate voluntarily in university committees or organizations.                            | Don't agree at all | <input type="checkbox"/> | <input type="checkbox"/> | <input type="checkbox"/> | <input type="checkbox"/> | <input type="checkbox"/> | Completely agree |

## 4. Contacts in and outside of university

- 4.1 **Do you have contact with German students at the university?**  yes  no

- 4.2 If yes, upon which occasion?

- 4.3 **and how often?**  daily/several times a week  once a week  infrequently

- 4.4 **Do you have contact with other international students at the university?**  yes  no

- 4.5 If yes, upon which occasion?

- 4.6 **and how often?**  daily/several times a week  once a week  infrequently

- 4.7 **Do you have contact with German students that don't attend your university?**  yes  no

- 4.8 If yes, upon which occasion?

# MUSTER

4.9 and how often?

daily/more  
times a week

once a week

infrequently

4.10 Do you have frequent contact  
with other people or groups  
outside of university?

yes

no

# MUSTER

## 4. Contacts in and outside of university [continued]

4.11 If yes, with whom and upon which occasion?

4.12 And how often?  daily/ several times a week  once a week  infrequently

## 5. Consultation, Counseling and Orientation at University

Did you have contact with (...) outside of orientation classes to get information and/or counseling? If so, how satisfied were you with the service provided? Is there a reason for your assessment?

5.1 **International Office**  very satisfied     not satisfied at all  not utilized

5.2 With which division?

5.3 Reason for assessment

5.4 **Faculty**  very satisfied     not satisfied at all  not utilized

5.5 With which division?

5.6 Reason for assessment

5.7 **Center for International Relations**  very satisfied     not satisfied at all  not utilized

5.8 With which division?

5.9 Reason for assessment

5.10 **Studentenwerk**  very satisfied     not satisfied at all  not utilized

5.11 With which division?

# MUSTER

5.12 Reason for assessment

# MUSTER

EvaSys

SI Semesterabschlussbefragung

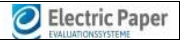

## 5. Consultation, Counseling and Orientation at University [Continued]

5.13 **Student's Council**                      very satisfied     not satisfied at all  not utilized

5.14 Reason for assessment

5.15 **Other**                                      very satisfied     not satisfied at all  not utilized

5.16 With which division?

5.17 Reason for assessment

## 6. Finances and Employment

6.1 How do you make a living? (multiple answers possible)

- Work                                       Parents/ Family                                       grand  
 Savings                                       other

## 7. Contents of Studienstart International

**7. German Classes:** How useful did you find...

7.1 Erasmus                                      useful    not useful

7.2 German for physicians                      useful    not useful

7.3 Tutorial Terminology                      useful    not useful

7.4 other German classes                      useful    not useful

**Studienstart International Classes:** How useful did you find....?

7.5 Intercultural awareness                      useful    not useful

7.6 Study Competencies                      useful    not useful

7.7 Orientation Classes                      useful    not useful

## 8. Professional Studies

# MUSTER

## 8. Professional Studies [continued]

8.1 How many credits did you receive this semester?

8.2 Do you feel well-prepared for your further course of studies?

yes

no

8.3 If not, what are you still missing?

8.4 Do you know where to turn to when questions during your course of studies arise?

yes

no

8.5 Did you make contacts to your fellow students in Studienstart International during this semester you would like to continue in the future?

yes

no

8.6 What did you like especially about Studienstart International?

8.7 What didn't you like about Studienstart International?

8.8 Did you face some serious difficulties this semester?

8.9 Do you have practical ideas for improvement?

9. Thank you for your participation!
